# Supplementary material
Source: Research Square preprint supplement (doi:10.21203/rs.3.rs-10034537/v1)
Supplement: Supplementary file 1 [file f2d1226dcab377c5ee9cbe12.xlsx]

## Sheet: Central_Zscores
	DF	FL	DM	PL	PW	NPP	NSP	SW	GY
YG50013	-0.54	-0.82	-0.37	-0.92	-0.76	-0.91	-0.24	-0.91	-0.88
YG50015	-0.54	-0.05	-0.62	-0.92	-0.76	0.09	0.96	-0.71	-0.46
YG50054	-1.28	-0.56	-1.25	-0.92	-0.76	-1.02	1.36	-0.84	-0.88
YG50068	-0.54	-0.3	-0.62	-0.11	-0.76	-0.56	-0.63	-0.65	-0.67
YG50075	1.31	1.76	1.27	1.65	1.32	1.5	0.56	0.86	1.01
YG50077	-0.35	-0.82	-0.37	-0.92	-0.76	-1.02	-0.43	-0.56	-0.67
YG50083	1.31	1.5	1.27	0.48	1.32	0.91	-1.03	1.61	0.8
YG50085	-1.28	-0.56	-1.25	-0.57	-0.76	-0.44	1.76	-0.82	-0.67
YG50086	-0.54	-0.82	-0.62	-0.57	-0.76	-1.08	-1.43	-0.72	-0.88
Yahsb	1.31	1.5	1.27	1.41	1.32	1.03	-1.03	1.32	1.43
Amran	1.13	-0.82	1.27	1.41	1.32	1.5	0.16	1.4	1.85

## Sheet: North_Zscores
	DF	FL	DM	PL	PW	NPP	NSP	SW	GY
YG50013	-0.55	-0.35	-0.53	-1.01	-0.26	-0.94	0.69	-0.55	-0.75
YG50015	-0.55	-0.35	-0.43	-0.5	-0.96	0.35	0.41	-0.69	-0.38
YG50054	-0.55	-0.03	-0.74	-0.77	-0.96	0.03	-0.46	-0.12	-0.75
YG50068	-0.55	-0.67	-0.74	-0.63	-0.61	-0.94	-1.32	-0.58	-1.13
YG50075	1.8	2.22	1.67	1.67	0.45	0.68	1.56	0.02	1.13
YG50077	-0.55	-0.67	-0.74	-0.77	-0.26	-0.62	-0.6	-0.52	-0.38
YG50083	2.09	1.57	1.67	0.99	0.45	0.35	1.84	-0.25	0.38
YG50085	-0.45	-0.35	-0.53	-0.77	-0.96	-1.27	-0.6	-0.69	-0.75
YG50086	-1.24	-0.99	-1.27	-0.77	-0.61	-0.94	-0.31	-0.74	-0.75
Yahsb	0.23	0.61	0.83	1.27	1.86	1.32	-1.32	1.92	1.5
Amran	0.33	-0.99	0.83	1.27	1.86	1.97	0.12	2.19	1.88

## Sheet: Central_RowClusters
Genotype	Cluster
YG50075	1
YG50083	1
Yahsb	1
Amran	1
YG50013	2
YG50068	2
YG50077	2
YG50086	2
YG50015	3
YG50054	3
YG50085	3

## Sheet: Central_ColClusters
Trait	Cluster
DF	1
DM	1
PL	1
PW	1
NPP	1
SW	1
GY	1
FL	2
NSP	3

## Sheet: North_RowClusters
Genotype	Cluster
YG50013	1
YG50015	1
YG50054	1
YG50068	1
YG50077	1
YG50085	1
YG50086	1
YG50075	2
YG50083	2
Yahsb	3
Amran	3

## Sheet: North_ColClusters
Trait	Cluster
PW	1
NPP	1
SW	1
GY	1
DF	2
FL	2
DM	2
PL	2
NSP	3
