# Supplementary material
Source: Research Square preprint supplement (doi:10.21203/rs.3.rs-10034537/v1)
Supplement: Supplementary file 1 [file fcce07768e8404f46bc1fa65.docx]

| Central Highlands Research station | | | | | | | | | | | | | |
| --- | --- | --- | --- | --- | --- | --- | --- | --- | --- | --- | --- | --- | --- |
|  |  | **DF** | DFLcm | LB  **mm** | LL  **cm** | LW  **cm** | **DM** | **PL**  **cm** | **PW cm** | **NPP** | **NSP** | **SW gm** |
| **1** | **YG50013** | **37** | **2** | **5** | **4** | **2.5** | **72** | **4** | **1** | **7.4** | **4.6** | **10.14** |
| 2 | YG50015 | **37** | **2** | **5** | **4** | **2.5** | **70** | **4** | **1** | **10.8** | **5.2** | **11.2** |
| 3 | YG50054 | **33** | **2** | **5** | **3.5** | **2** | **65** | **4** | **1** | **7** | **5.4** | **10.52** |
| 4 | YG50068 | **37** | **2** | **5** | **4** | **2** | **70** | **4.7** | **1** | **8.6** | **4.4** | **11.53** |
| 5 | YG50075 | **47** | **3** | **8** | **5** | **3** | **85** | **6.2** | **1.5** | **15.6** | **5** | **19.4** |
| 6 | YG50077 | **38** | **2** | **5** | **5** | **2.5** | **72** | **4.0** | **1** | **7** | **4.5** | **12** |
| 7 | YG50083 | **47** | **3** | **8** | **5** | **3** | **85** | **5.2** | **1.5** | **13.6** | **4.2** | **23.3** |
| 8 | YG50085 | **33** | **2** | **5** | **3.5** | **1.5** | **65** | **4.3** | **1** | **9** | **5.6** | **10.61** |
| 9 | YG50086 | **37** | **2** | **5** | **3.5** | **1.5** | **70** | **4.3** | **1** | **6.8** | **4** | **11.16** |
| 10 | Yahsb | **47** | **3** | **8** | **5.5** | **3** | **85** | **6** | **1.5** | **14** | **4.2** | **21.8** |
| 11 | Amran | **46** | **3** | **8** | **5.5** | **3** | **85** | **6** | **1.5** | **15.6** | **4.8** | **22.2** |
| Northern Highlands Research station | | | | | | | | | | | | | |
|  |  | **DF** | DFLcm | LB  **mm** | LL  **cm** | LW  **cm** | **DM** | **PL**  **cm** | **PW cm** | **NPP** | **NSP** | **SW gm** |
| **1** | **YG50013** | **38** | **2** | **5** | **4** | **2** | **77** | **4.32** | **0.8** | **7** | **5.4** | **11.9** |
| 2 | YG50015 | **38** | **2** | **5** | **4** | **2** | **78** | **4.7** | **0.6** | **11** | **5.2** | **11.4** |
| 3 | YG50054 | **38** | **2** | **5** | **3.5** | **2** | **75** | **4.5** | **0.6** | **10** | **4.6** | **13.5** |
| 4 | YG50068 | **38** | **2** | **5** | **4** | **3** | **75** | **4.6** | **0.7** | **7** | **4** | **11.8** |
| 5 | YG50075 | **62** | **3** | **8** | **5** | **3** | **98** | **6.3** | **1** | **12** | **6** | **14** |
| 6 | YG50077 | **38** | **2** | **5** | **5** | **3** | **75** | **4.5** | **0.8** | **8** | **4.5** | **12** |
| 7 | YG50083 | **65** | **3** | **8** | **5** | **3** | **98** | **5.8** | **1** | **11** | **6.2** | **13** |
| 8 | YG50085 | **39** | **2** | **5** | **3.5** | **1.5** | **77** | **4.5** | **0.6** | **6** | **4.5** | **11.4** |
| 9 | YG50086 | **31** | **2** | **5** | **3.5** | **1.5** | **70** | **4.5** | **0.7** | **7** | **4.7** | **11.2** |
| 10 | Yahsb | **46** | **3** | **8** | **5** | **3** | **90** | **6** | **1.4** | **14** | **4** | **21** |
| 11 | Amran | **47** | **3** | **8** | **5** | **3** | **90** | **6** | **1.4** | **16** | **5** | **22** |

Average values ​​of eleven quantitative traits used to construct the dendrogram**.**

Diameter of flower (DFL), Length of bud the flower (LB), leaflet length (LL), leaflet width (LW), days to flowering (DF), pod width (PW), the number of seed per pod (NSP), the number of seed per plant (NPP), pod length (PL), days to maturity (DM) and seed weight (SW**)**

| Central Highlands Research station | | | | | | | | | | | |
| --- | --- | --- | --- | --- | --- | --- | --- | --- | --- | --- | --- |
|  |  | **DF** | **FL**  **mm** | **DM** | **PL**  **cm** | **PW cm** | **NPP** | **NSP** | **SW gm** | **GY ton** |
| **1** | **YG50013** | **37** | **10** | **72** | **4** | **1** | **7.4** | **4.6** | **10.14** | **0.5** |
| 2 | YG50015 | **37** | **13** | **70** | **4** | **1** | **10.8** | **5.2** | **11.2** | **0.7** |
| 3 | YG50054 | **33** | **11** | **65** | **4** | **1** | **7** | **5.4** | **10.52** | **0.5** |
| 4 | YG50068 | **37** | **12** | **70** | **4.7** | **1** | **8.6** | **4.4** | **11.53** | **0.6** |
| 5 | YG50075 | **47** | **20** | **85** | **6.2** | **1.5** | **15.6** | **5** | **19.4** | **1.4** |
| 6 | YG50077 | **38** | **10** | **72** | **4.0** | **1** | **7** | **4.5** | **12** | **0.6** |
| 7 | YG50083 | **47** | **19** | **85** | **5.2** | **1.5** | **13.6** | **4.2** | **23.3** | **1.3** |
| 8 | YG50085 | **33** | **11** | **65** | **4.3** | **1** | **9** | **5.6** | **10.61** | **0.6** |
| 9 | YG50086 | **37** | **10** | **70** | **4.3** | **1** | **6.8** | **4** | **11.16** | **0.5** |
| 10 | Yahsb | **47** | **19** | **85** | **6** | **1.5** | **14** | **4.2** | **21.8** | **1.6** |
| 11 | Amran | **46** | **10** | **85** | **6** | **1.5** | **15.6** | **4.8** | **22.2** | **1.8** |
| Northern Highlands Research station | | | | | | | | | | | |
|  |  | **DF** | **FL mm** | **DM** | **PL**  **cm** | **PW cm** | **NPP** | **NSP** | **SW gm** | **GY ton** |
| **1** | **YG50013** | **38** | **12** | **77** | **4.32** | **0.8** | **7** | **5.4** | **11.9** | **0.5** |
| 2 | YG50015 | **38** | **12** | **78** | **4.7** | **0.6** | **11** | **5.2** | **11.4** | **0.6** |
| 3 | YG50054 | **38** | **13** | **75** | **4.5** | **0.6** | **10** | **4.6** | **13.5** | **0.5** |
| 4 | YG50068 | **38** | **11** | **75** | **4.6** | **0.7** | **7** | **4** | **11.8** | **0.4** |
| 5 | YG50075 | **62** | **20** | **98** | **6.3** | **1** | **12** | **6** | **14** | **1** |
| 6 | YG50077 | **38** | **11** | **75** | **4.5** | **0.8** | **8** | **4.5** | **12** | **0.6** |
| 7 | YG50083 | **65** | **18** | **98** | **5.8** | **1** | **11** | **6.2** | **13** | **0.8** |
| 8 | YG50085 | **39** | **12** | **77** | **4.5** | **0.6** | **6** | **4.5** | **11.4** | **0.5** |
| 9 | YG50086 | **31** | **10** | **70** | **4.5** | **0.7** | **7** | **4.7** | **11.2** | **0.5** |
| 10 | Yahsb | **46** | **15** | **90** | **6** | **1.4** | **14** | **4** | **21** | **1.1** |
| 11 | Amran | **47** | **10** | **90** | **6** | **1.4** | **16** | **5** | **22** | **1.2** |

Average values ​​of nine quantitative traits used in analyses (PCA, correlation, path, heat map, mean performance)- DF = Days to flowering; FL = Flower length; DM = Days to maturity; PL = Pod length; PW = Pod width; NPP = Number of pods per plant; NSP = Number of seeds per pod; SW = 100-seed weight; GY = Grain yield

**PCA Loadings — Central Highlands**

| **Trait** | **PC1** | **PC2** | |
| --- | --- | --- | --- |
| DF | −0.98 | −0.14 | |
| FL | −0.77 | 0.05 | |
| DM | −0.98 | −0.13 | |
| PL | −0.94 | 0.10 | |
| PW | −0.99 | 0.06 | |
| NPP | −0.94 | 0.29 | |
| NSP | 0.32 | 0.94 | |
| SW | −0.98 | −0.03 | |
| GY | −0.96 | 0.13 | |
| **Component** | | | **Eigenvalue contribution** | |
| PC1 | | | 80.5% | |
| PC2 | | | 11.6% | |
| Total | | | 92.1% | |

**PCA Loadings — Northern Highlands**

| **Trait** | **PC1** | **PC2** | |
| --- | --- | --- | --- |
| DF | −0.84 | −0.50 | |
| FL | −0.66 | −0.64 | |
| DM | −0.95 | −0.27 | |
| PL | −0.98 | 0.02 | |
| PW | −0.85 | 0.44 | |
| NPP | −0.86 | 0.34 | |
| NSP | −0.47 | −0.72 | |
| SW | −0.73 | 0.65 | |
| GY | −0.73 | 0.39 | |
| **Component** | | | **Explained variance** | |
| PC1 | | | 64.0% | |
| PC2 | | | 23.9% | |
| Total | | | 87.9% | |
