# Supplementary material
Source: Research Square preprint supplement (doi:10.21203/rs.3.rs-10034537/v1)
Supplement: Supplementary file 2 [file f995a8ae11c0ab9460047058.xlsx]

## Sheet: Central Highlands
	DF	FL	DM	PL	PW	NPP	NSP	SW	GY
DF	1	0.7381	0.9965	0.894	-0.3705	0.8879	-0.445	0.9536	0.9192
FL	0.7381	1	0.7031	0.6789	-0.2806	0.7072	-0.1929	0.7019	0.608
DM	0.9965	0.7031	1	0.8932	-0.3821	0.8887	-0.4237	0.9544	0.9285
PL	0.894	0.6789	0.8932	1	-0.2102	0.9139	-0.2215	0.8879	0.9362
PW	-0.3705	-0.2806	-0.3821	-0.2102	1	-0.3006	0.0606	-0.3012	-0.3045
NPP	0.8879	0.7072	0.8887	0.9139	-0.3006	1	-0.0392	0.9012	0.9503
NSP	-0.445	-0.1929	-0.4237	-0.2215	0.0606	-0.0392	1	-0.3351	-0.1875
SW	0.9536	0.7019	0.9544	0.8879	-0.3012	0.9012	-0.3351	1	0.9536
GY	0.9192	0.608	0.9285	0.9362	-0.3045	0.9503	-0.1875	0.9536	1

## Sheet: Northern Highlands
	DF	FL	DM	PL	PW	NPP	NSP	SW	GY
DF	1	0.8735	0.9574	0.8277	0.5146	0.5286	0.7042	0.2961	0.6276
FL	0.8735	1	0.8023	0.6642	0.2706	0.3219	0.6242	0.0727	0.4161
DM	0.9574	0.8023	1	0.9369	0.7092	0.7115	0.6028	0.5309	0.8105
PL	0.8277	0.6642	0.9369	1	0.834	0.8336	0.3962	0.7128	0.9276
PW	0.5146	0.2706	0.7092	0.834	1	0.8185	0.081	0.9165	0.9284
NPP	0.5286	0.3219	0.7115	0.8336	0.8185	1	0.2125	0.8646	0.9175
NSP	0.7042	0.6242	0.6028	0.3962	0.081	0.2125	1	-0.1453	0.2504
SW	0.2961	0.0727	0.5309	0.7128	0.9165	0.8646	-0.1453	1	0.8744
GY	0.6276	0.4161	0.8105	0.9276	0.9284	0.9175	0.2504	0.8744	1
